# Supplementary material for: Methotrexate treatment before use of biologics in rheumatoid arthritis: Analysis of guideline compliance
Source: Z Rheumatol. 2021 Sep 20;82(7):573–9. [Article in German] doi: 10.1007/s00393-021-01086-0 (PMC10495498; doi:10.1007/s00393-021-01086-0)
Supplement: Supplementary file 1 [file 393_2021_1086_MOESM1_ESM.pdf]

## Zusatzmaterial

**Tabelle S1** Verordnete bDMARDs

| bDMARD       | ATC-Code |
|--------------|----------|
| Abatacept    | L04AA24  |
| Adalimumab   | L04AB04  |
| Anakinra     | L04AC03  |
| Certolizumab | L04AB05  |
| Etanercept   | L04AB01  |
| Golimumab    | L04AB06  |
| Infliximab   | L04AB02  |
| Rituximab    | L01XC02  |
| Tocilizumab  | L04AC07  |

**ATC** Anatomisch-Therapeutisch-Chemisch, **bDMARD** biologic disease-modifying antirheumatic drug

**Tabelle S2** Durchschnittliche MTX-Maximaldosierungen

|                                          | MTX-Maximaldosierung (mg)<br>MW (SD) | p-Wert <sup>a,c</sup> |
|------------------------------------------|--------------------------------------|-----------------------|
| <b>Geschlecht</b>                        |                                      | <b>&lt;0,0001</b>     |
| männlich                                 | 17,1 (±4,8)                          |                       |
| weiblich                                 | 14,9 (±5,0)                          |                       |
| <b>Altersgruppe<sup>b</sup></b>          | 15,7 (±5,3)                          | 0,1253                |
| <b>Diagnosegruppe</b>                    |                                      | 0,4793                |
| M05                                      | 16,1 (±5,2)                          |                       |
| M06                                      | 15,9 (±5,1)                          |                       |
| M05/M06                                  | 15,4 (±5,0)                          |                       |
| <b>Krankheitsstatus</b>                  |                                      | 0,0705                |
| inzident                                 | 16,5 (±5,3)                          |                       |
| prävalent                                | 15,4 (±5,0)                          |                       |
| <b>Komorbidität: Niereninsuffizienz</b>  | 14,4 (±5,5)                          | 0,2340                |
| <b>Subgruppe Leflunomid/Sulfasalazin</b> | 15,6 (±5,1)                          | 0,6699                |

<sup>a</sup>Fett gedruckte Werte zeigen statistische Signifikanz zum 5 %-Niveau, <sup>b</sup> Altersgruppe wurde in folgende Klassen eingeteilt: 18-29 Jahre, 30-39 Jahre, 40-49 Jahre, 50-59 Jahre, 60-69 Jahre, 70-83 Jahre, <sup>c</sup> Für die Variablen Altersgruppe und Diagnosegruppe wurde eine einfaktorielle Varianzanalyse genutzt. p-Werte der übrigen Variablen basieren auf dem t-Test, **MTX** Methotrexat, **MW** Mittelwert, **SD** „standard deviation“, Standardabweichung.

**Tabelle S3** Maximal verordnete MTX-Dosierung im Beobachtungszeitraum der Sulfasalazin/Leflunomid Subgruppe nach Krankheitsstatus

|                                  | Inzident (n=49) |      | Prävalent (n=156) |      | Gesamt (n=205) |      |
|----------------------------------|-----------------|------|-------------------|------|----------------|------|
| MTX-Dosierung                    | n               | %    | n                 | %    | n              | %    |
| <b>2,5mg - 7,5mg</b>             | 4               | 8,2  | 11                | 7,1  | 15             | 7,3  |
| <b>10mg - 12,5mg</b>             | 11              | 22,4 | 42                | 26,9 | 53             | 25,9 |
| <b>15mg - 17,5mg<sup>a</sup></b> | 14              | 28,6 | 46                | 29,5 | 60             | 29,3 |
| <b>20mg - 22,5mg</b>             | 15              | 30,6 | 47                | 30,1 | 62             | 30,2 |
| <b>≥25mg<sup>b</sup></b>         | 5               | 10,2 | 10                | 6,4  | 15             | 7,3  |

<sup>a</sup> Oral verordnete Dosierungen in dieser Gruppe betragen ausschließlich 15 mg, <sup>b</sup> Alle Dosierungen in dieser Gruppe betragen 25 mg, **MTX** Methotrexat.
